# Supplementary material for: Farming of maize-like zinc oxide via a modified SILAR technique as a selective and sensitive nitrogen dioxide gas sensor
Source: Royal Society of Chemistry journal article supplement (doi:10.1039/c6ra06346b), 2016-01-01

## Farming of maize like zinc oxide via modified SILAR technique for a selective and sensitive nitrogen dioxide gas sensor

V. L. Patil,<sup>a</sup> S. A. Vanalakar,<sup>a,b,\*</sup> A. S. Kamble,<sup>b</sup> S. S. Shendage,<sup>c</sup> J. H. Kim,<sup>b\*</sup> and P. S. Patil<sup>c\*</sup>

<sup>a</sup>Department of Physics, Karmaveer Hire Arts, Science, Commerce and Education College, Gargoti 416-009, India.

<sup>b</sup>Department of Materials Science and Engineering, Chonnam National University, Gwangju 500-757, South Korea.

<sup>c</sup>Department of Physics, Shivaji University, Kolhapur 416-009, India

### Electronic Supplementary Information

**Fig. (S1):** Nitrogen adsorption-desorption isotherms of the ZnO:35, ZnO:40 and ZnO:45 samples.

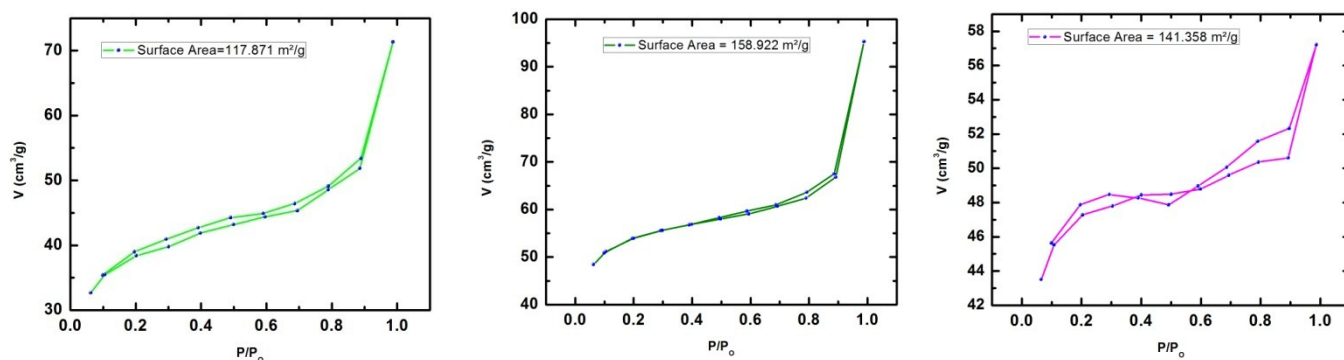

**Fig. (S2):** The calibration curve of NO<sub>2</sub> gas of sample ZnO:40.

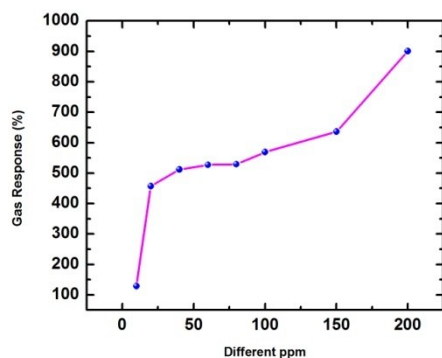

Supplement: c6ra06346b1.pdf [file c6ra06346b1.pdf]
